# Supplementary material
Source: ML conference proceedings conference paper supplement (https://openaccess.thecvf.com/content/ICCV2023/html/Chen_Text2Tex_Text-driven_Texture_ICCV_2023_paper.html)
Supplement: Supplementary file 1 [file Chen_Text2Tex_Text-driven_Texture_ICCV_2023_supplemental.zip]

Archive with 2 entries (2 files):
- 04677_supp.mp4
- 04677_supp.pdf
